# Supplementary material for: Co-Production of Poly(3-hydroxybutyrate) and Gluconic Acid from Glucose by Halomonas elongata
Source: MDPI journal article supplement (doi:10.3390/bioengineering10060643), 2023-05-25
Supplement: s1 [file s1]

# Co-Production of Poly(3-Hydroxybutyrate) and Gluconic Acid from Glucose by *Halomonas elongata*

Tânia Leandro <sup>1,2</sup>, M. Conceição Oliveira <sup>3</sup>, M. Manuela R. da Fonseca <sup>1,2</sup> and M. Teresa Cesário <sup>1,2,\*</sup>

<sup>1</sup> IBB-Institute for Bioengineering and Biosciences, Bioengineering Department, Instituto Superior Técnico, Universidade de Lisboa, Av. Rovisco Pais, 1049-001 Lisboa, Portugal; tania.leandro@tecnico.ulisboa.pt (T.L.); manuela.fonseca@tecnico.ulisboa.pt (M.M.R.d.F.)

<sup>2</sup> Associate Laboratory i4HB—Institute for Health and Bioeconomy, Instituto Superior Técnico, Universidade de Lisboa—Portugal, 1049-001 Lisbon, Portugal

<sup>3</sup> Centro de Química Estrutural, Institute of Molecular Sciences, Instituto Superior Técnico, Universidade de Lisboa, Av. Rovisco Pais, 1049-001 Lisboa, Portugal; conceicao.oliveira@tecnico.ulisboa.pt

\* Correspondence: teresa.cesario@tecnico.ulisboa.pt

## Supplementary Materials

### Co-Production of Poly(3-Hydroxybutyrate) and Gluconic Acid from Glucose by *Halomonas elongata*

Tânia Leandro <sup>1,2</sup>, M. Conceição Oliveira <sup>3</sup>, M. Manuela R. da Fonseca <sup>1,2</sup> and  
Cesário <sup>1,2,\*</sup>

M. Teresa

<sup>1</sup> IBB-Institute for Bioengineering and Biosciences, Bioengineering Department, Instituto Superior Técnico, Universidade de Lisboa, Av. Rovisco Pais, 1049-001 Lisboa, Portugal; tania.leandro@tecnico.ulisboa.pt (T.L.); manuela.fonseca@tecnico.ulisboa.pt (M.M.R.d.F.)

<sup>2</sup> Associate Laboratory i4HB—Institute for Health and Bioeconomy, Instituto Superior Técnico, Universidade de Lisboa—Portugal, Lisbon, Portugal

<sup>3</sup> Centro de Química Estrutural, Institute of Molecular Sciences, Instituto Superior Técnico, Universidade de Lisboa, Av. Rovisco Pais, 1049-001 Lisboa, Portugal; conceicao.oliveira@tecnico.ulisboa.pt

\* Correspondence: teresa.cesario@tecnico.ulisboa.pt

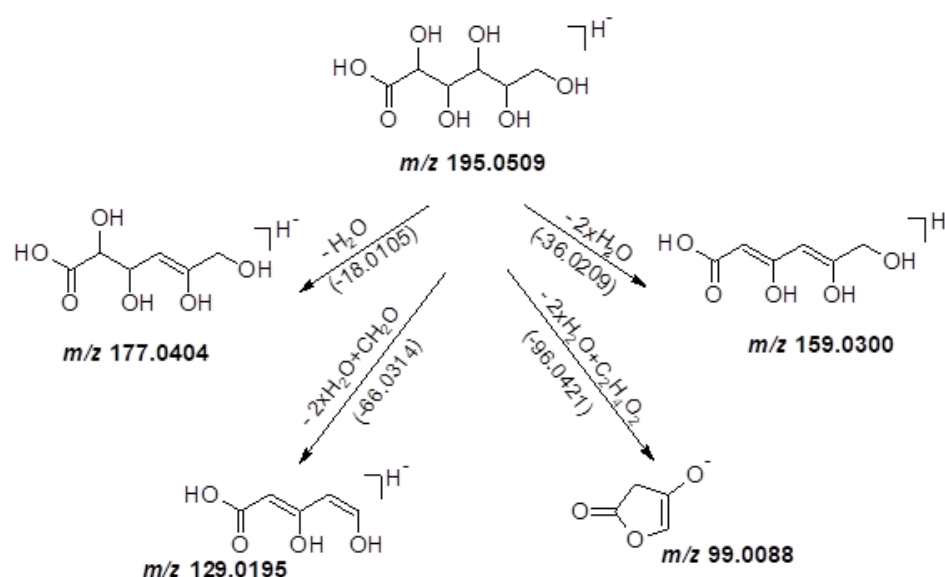

**Figure S1.** Proposed fragmentation pattern for the deprotonated molecule of gluconic acid  $m/z$  195.0509 [ $C_6H_{11}O_7$ ]<sup>−</sup>.

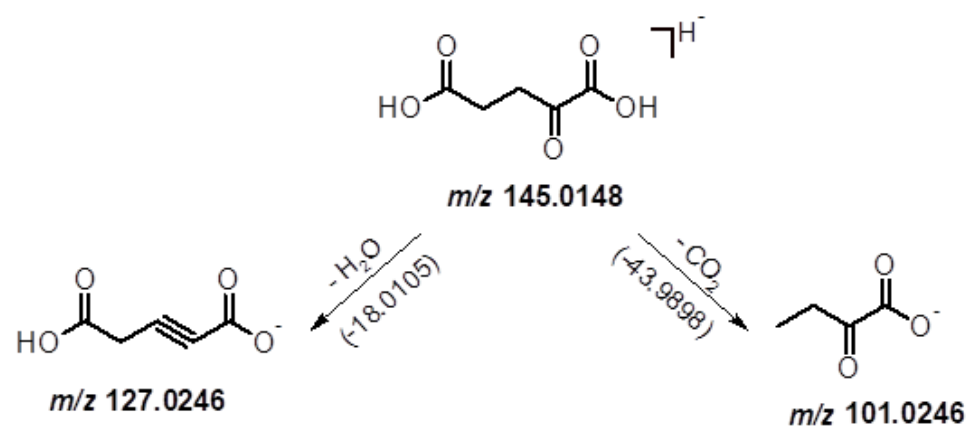

**Figure S2.** Proposed fragmentation pattern for the deprotonated molecule 2-oxoglutaric acid  $m/z$  145.0148  $[C_5H_5O_5]^-$ .
